# Supplementary material for: One-step pyrolysis for the preparation of sulfur-doped biochar loaded with iron nanoparticles as an effective peroxymonosulfate activator for RhB degradation
Source: Royal Society of Chemistry journal article supplement (doi:10.1039/d1nj05834g), 2022-01-01
Supplement: d1nj05834g1.pdf [file d1nj05834g1.pdf]

## Support Information

### **One-step pyrolysis prepared Sulfur-doped biochar loaded with Iron nanoparticles as an effective peroxymonosulfate activator for RhB degradation**

*Shuangshuang Yang<sup>a</sup>, Shengxiao Zhang<sup>a\*</sup>, Xin Li<sup>a</sup>, Yaxuan Du<sup>a</sup>, Yuxin Xing<sup>a</sup>, Qiang Xu<sup>a</sup>, Zhenhua Wang<sup>b, \*</sup>, Li Li<sup>a</sup>, Xiaotong Zhu<sup>a</sup>*

*<sup>a</sup>School of Chemistry and Materials Science, Collaborative Innovation Center of Shandong Province for High Performance Fibers and Their Composites, Ludong University, Yantai 264025, Shandong province, China*

*<sup>b</sup>Shandong Analysis and Test Center, Qilu University of Technology (Shandong Academy of Sciences), Jinan 250014, China*

**\*Corresponding author: Shengxiao Zhang, Zhenhua Wang**

**Ludong University**

**School of Chemistry and Materials Science**

**Yantai 264025, China**

**E-mail Address: [beijingzsx@163.com](mailto:beijingzsx@163.com) (Shengxiao Zhang)**

**[wzh312@sohu.com](mailto:wzh312@sohu.com) (Zhenhua Wang)**

**Tel: (086) 0535-6672176;**

**Fax: (086) 0535-6695905**

## Contents

**Table S1.** Dosage of raw materials for synthesis of different Fe/S-BC

**Table S2.** The intermediates detected by HPLC-ESI-HRMS/MS from the RhB degradation in the system of Fe/S<sub>0.05</sub>-BC activating PMS

**Scheme S1.** Possible degradation pathway of RhB in the Fe/S<sub>0.05</sub>-BC/PMS system

**Figure S1.** UV-vis spectra and color variation (inset figure) of RhB at different reaction time in Fe/S<sub>0.05</sub>-BC/PMS. Experimental conditions: [RhB] = 20 mg/L; [Fe/S<sub>0.05</sub>-BC] = 0.05 g/L; [PMS] = 0.5 g/L; Temperature = 30 °C; pH = 7.0.

**Figure S2.** Reusability of Fe/S<sub>0.05</sub>-BC for RhB degradation. Reaction conditions: [RhB] = 20 mg/L; [Fe/S<sub>0.05</sub>-BC] = 0.05 g/L; [PMS] = 0.5 g/L; Temperature = 30 °C; pH = 7.0.

**Figure S3.** (a) XPS survey spectra, (b) High-resolution Fe 2p, and (c) S 2p spectra of used Fe/S<sub>0.05</sub>-BC.

**Figure S4.** TOC removal of RhB by different system. Experimental conditions: [RhB] = 20 mg/L; [Fe/S<sub>0.05</sub>-BC] = 0.2 g/L; [PMS] = 2 g/L; Temperature = 30 °C; pH = 7.0.

**Figure S5.** Degradation rate of various organic pollutants by Fe/S<sub>0.05</sub>-BC/PMS system. Reaction conditions: [RhB] = 20 mg/L; [Fe/S<sub>0.05</sub>-BC] = 0.05 g/L; [PMS] = 0.5 g/L; Temperature = 30 °C; pH = 7.0.

**Figure S6.** RhB degradation in the presence of methanol, TBA, p-benzoquinone, KI and L-Histidine as radical scavenger. Experimental conditions: [RhB] = 20 mg/L; [Fe/S<sub>0.05</sub>-BC] = 0.05 g/L; [PMS] = 0.5 g/L; Temperature = 30 °C; pH = 7.0

**Figure S7.** HPLC-HRMS/MS mass spectra of the intermediates from the RhB degradation in the system of Fe/S<sub>0.05</sub>-BC activating PMS. The above graph is mass spectrum of RhB degradation solution, and the below graph is standard mass spectrum of the corresponding intermediate in library in each spectrum.

**Table S1.** Dosage of raw materials for synthesis of different Fe/S-BC

| Composites<br>name       | Mass ratios of<br>$\text{Na}_2\text{S}_2\text{O}_3 \cdot 5\text{H}_2\text{O}$ (%) | Weight of $\text{FeCl}_3$<br>(g) | Weight of cherry stone<br>powder (g) |
|--------------------------|-----------------------------------------------------------------------------------|----------------------------------|--------------------------------------|
| Fe-BC                    | 0                                                                                 | 5.78                             | 2.0                                  |
| Fe/S <sub>0.03</sub> -BC | 3%                                                                                | 5.78                             | 2.0                                  |
| Fe/S <sub>0.05</sub> -BC | 5%                                                                                | 5.78                             | 2.0                                  |
| Fe/S <sub>0.1</sub> -BC  | 10%                                                                               | 5.78                             | 2.0                                  |

**Table S2.** The intermediates detected by HPLC-ESI-HRMS/MS from the RhB degradation in the system of Fe/S<sub>0.05</sub>-BC activating PMS

| Pathway                       | Structure                                                                                        | Name                                             | Formula                                                                    | Formula weight |
|-------------------------------|--------------------------------------------------------------------------------------------------|--------------------------------------------------|----------------------------------------------------------------------------|----------------|
| N-de-ethylation Products      | <div>A</div> 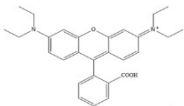   | Rhodamine B                                      | C <sub>28</sub> H <sub>31</sub> ClN <sub>2</sub> O <sub>3</sub>            | 479.01         |
|                               | <div>B</div> 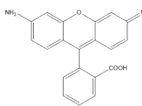   | 6-amino-9-(2-carboxyphenyl)-3H-xanthen-3-iminium | C <sub>20</sub> H <sub>15</sub> N <sub>2</sub> O <sub>3</sub> <sup>+</sup> | 331.1077       |
| Chromophore cleavage Products | <div>C</div> 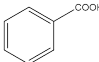   | Benzoic acid                                     | C <sub>7</sub> H <sub>6</sub> O <sub>2</sub>                               | 122.0368       |
|                               | <div>D</div> 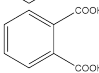   | Phthalic acid                                    | C <sub>8</sub> H <sub>6</sub> O <sub>4</sub>                               | 166.0266       |
|                               | <div>E</div> 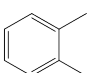   | O-xylene                                         | C <sub>8</sub> H <sub>10</sub>                                             | 106.0783       |
|                               | <div>F</div> 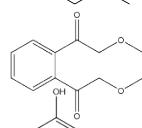  | 1,1'-(1,2-phenylene)bis(2-methoxyethan-1-one)    | C <sub>12</sub> H <sub>14</sub> O <sub>4</sub>                             | 222.0892       |
|                               | <div>G</div> 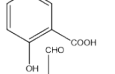 | 2,5-dihydroxybenzoic acid                        | C <sub>7</sub> H <sub>6</sub> O <sub>4</sub>                               | 154.0266       |
|                               | <div>H</div> 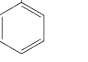 | Benzaldehyde                                     | C <sub>7</sub> H <sub>6</sub> O                                            | 106.0419       |
|                               | <div>I</div> 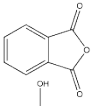 | Isobenzofuran-1,3-dione                          | C <sub>8</sub> H <sub>4</sub> O <sub>3</sub>                               | 148.0160       |
|                               | <div>J</div> 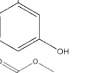 | Resorcinol                                       | C <sub>6</sub> H <sub>6</sub> O <sub>2</sub>                               | 110.0368       |
|                               | <div>K</div> 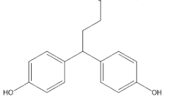 | Methyl 4,4-bis(4-hydroxyphenyl) butanoate        | C <sub>17</sub> H <sub>18</sub> O <sub>4</sub>                             | 286.1205       |
|                               | <div>L</div> 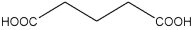 | Glutaric acid                                    | C <sub>5</sub> H <sub>8</sub> O <sub>4</sub>                               | 132.0423       |
| Opening-ring Products         | <div>M</div> 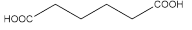 | Adipic acid                                      | C <sub>6</sub> H <sub>10</sub> O <sub>4</sub>                              | 146.0579       |
|                               | <div>N</div> 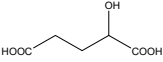 | 2-hydroxypentanedioic acid                       | C <sub>5</sub> H <sub>8</sub> O <sub>5</sub>                               | 148.0372       |
|                               | <div>O</div> 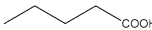 | Pentanoic acid                                   | C <sub>5</sub> H <sub>10</sub> O <sub>2</sub>                              | 102.0681       |

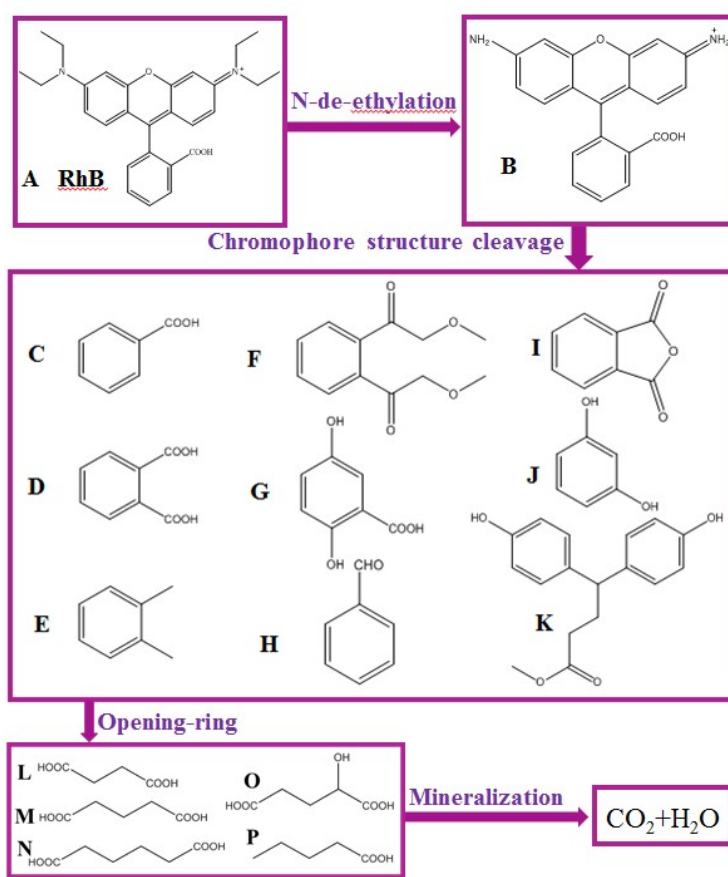

**Scheme S1.** Possible degradation pathway of RhB in the Fe/S<sub>0.05</sub>-BC/PMS system

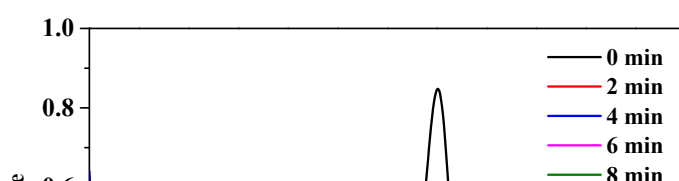

**Figure S1.** UV-vis spectra and color variation (inset figure) of RhB at different reaction time in Fe/S<sub>0.05</sub>-BC/PMS. Experimental conditions: [RhB] = 20 mg/L; [Fe/S<sub>0.05</sub>-BC] = 0.05 g/L; [PMS] = 0.5 g/L; Temperature = 30 °C; pH = 7.0.

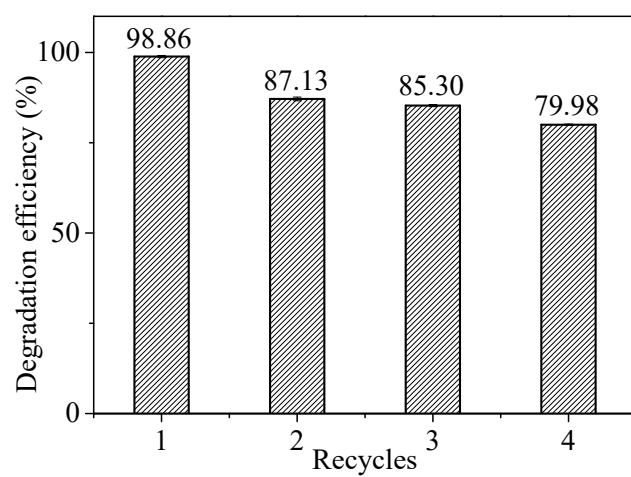

**Figure S2.** Reusability of Fe/S<sub>0.05</sub>-BC for RhB degradation. Reaction conditions: [RhB] = 20 mg/L; [Fe/S<sub>0.05</sub>-BC] = 0.05 g/L; [PMS] = 0.5 g/L; Temperature = 30 °C; pH = 7.0

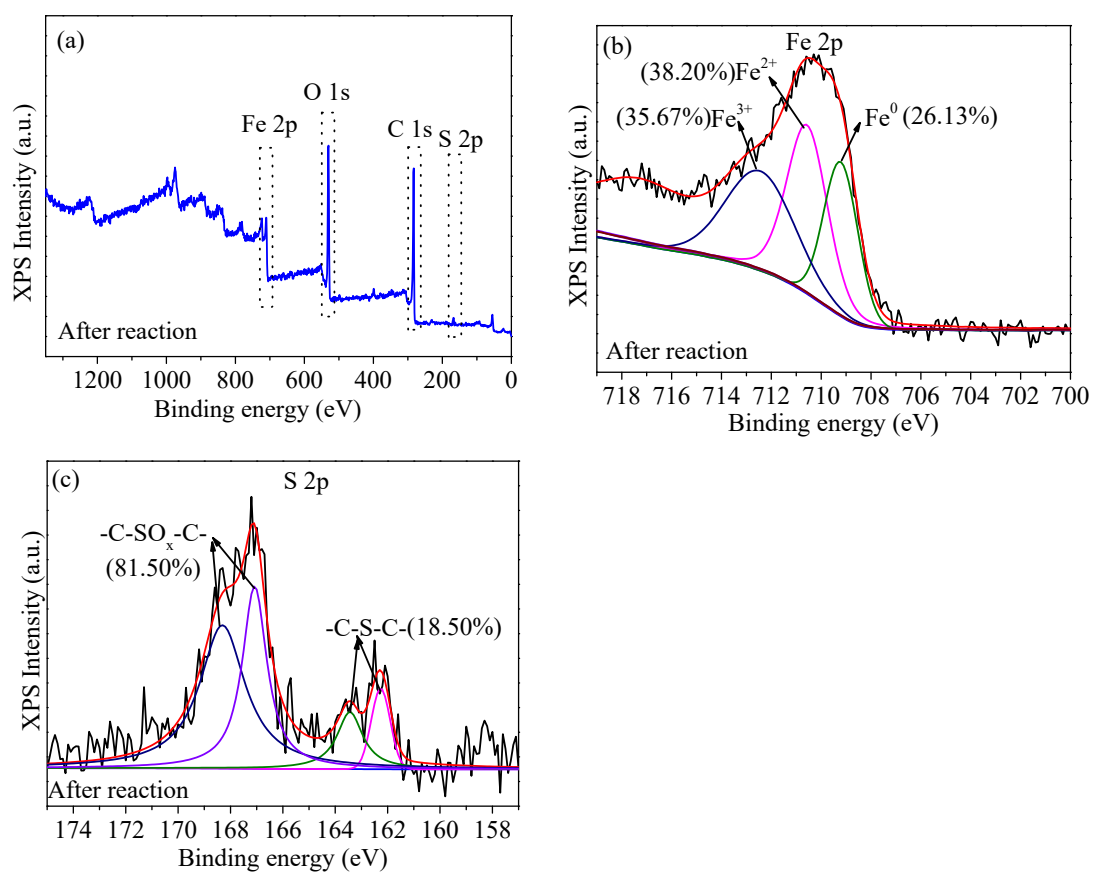

**Figure S3.** (a) XPS survey spectra, (b) High-resolution Fe 2p, and (c) S 2p spectra of used Fe/S<sub>0.05</sub>-BC

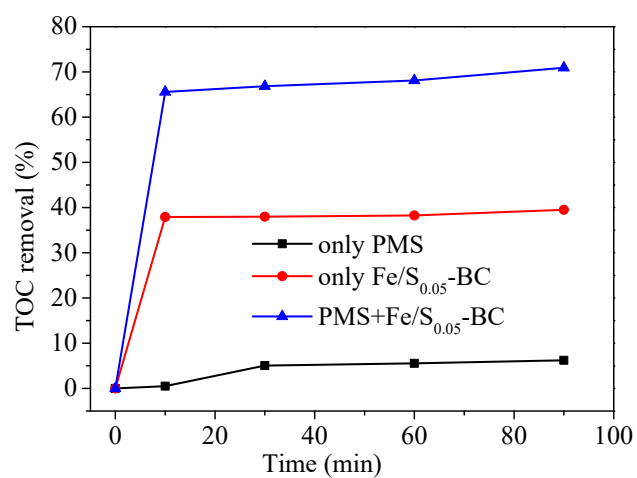

**Figure S4.** TOC removal of RhB by different system. Experimental conditions: [RhB] = 20 mg/L; [Fe/S<sub>0.05</sub>-BC] = 0.2 g/L; [PMS] = 2 g/L; Temperature = 30 °C; pH = 7.0.

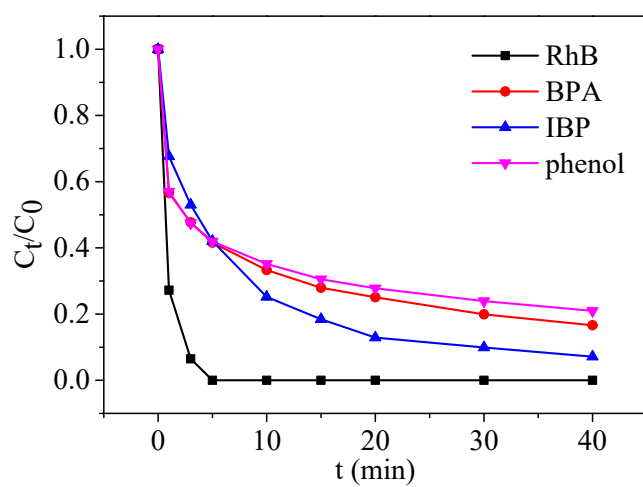

**Figure S5.** Degradation rate of various organic pollutants by Fe/S<sub>0.05</sub>-BC/PMS system. Reaction conditions: [RhB] = 20 mg/L; [Fe/S<sub>0.05</sub>-BC] = 0.05 g/L; [PMS] = 0.5 g/L; Temperature = 30 °C; pH = 7.0.

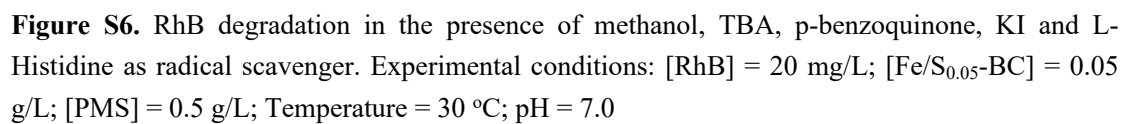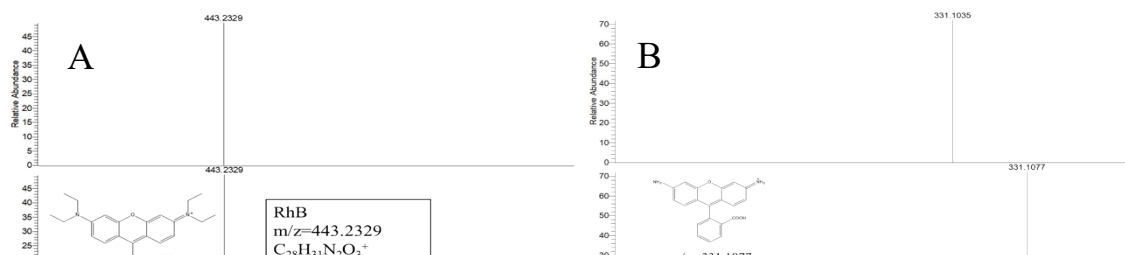

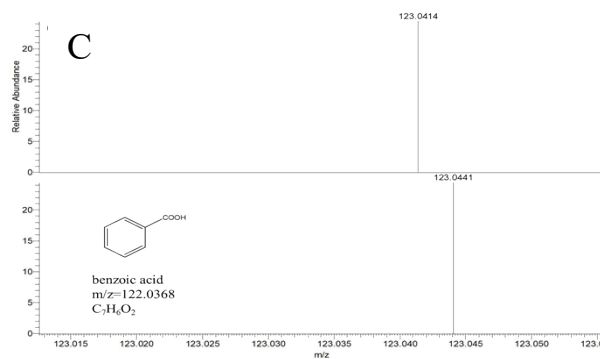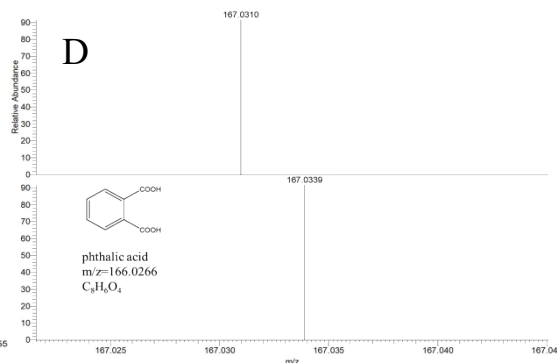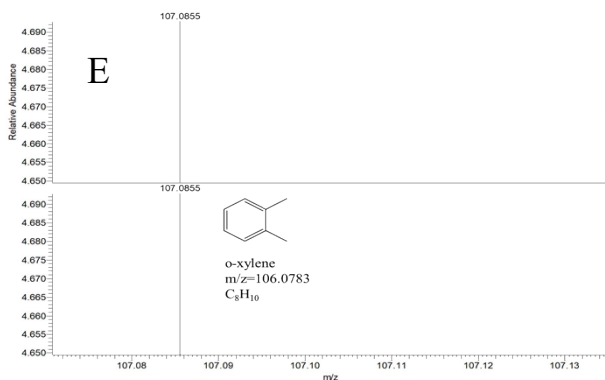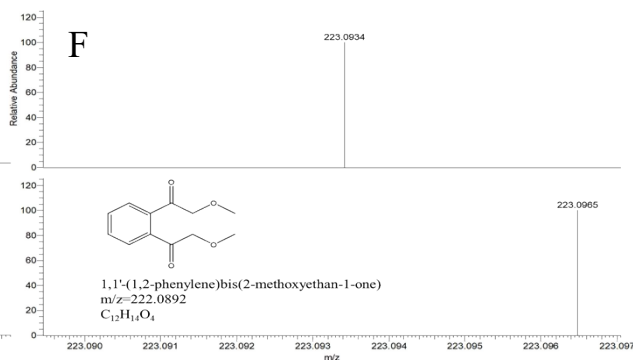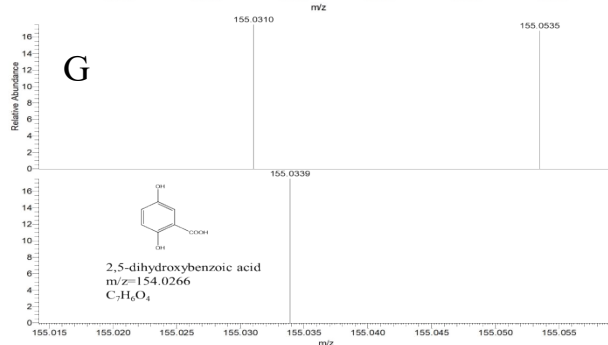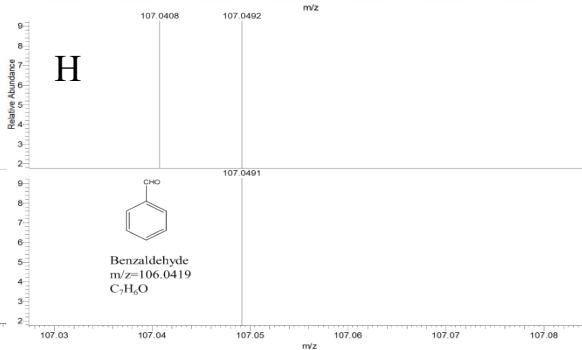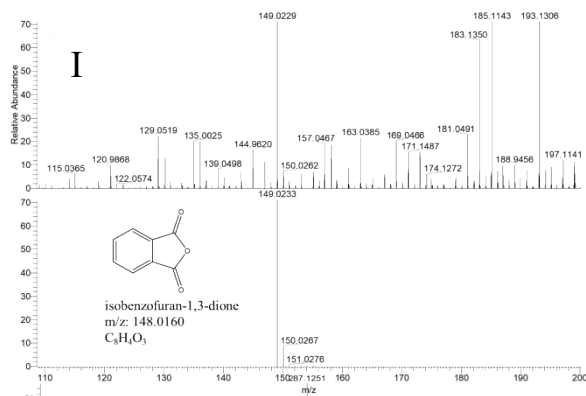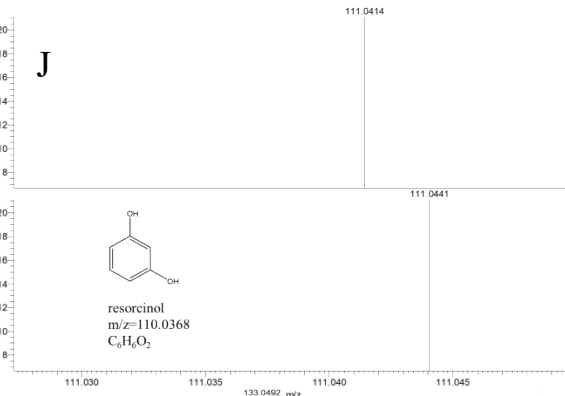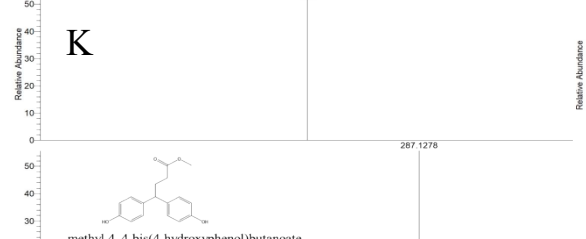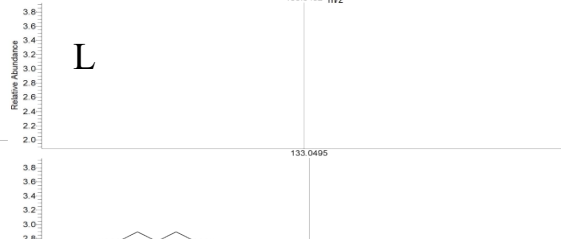

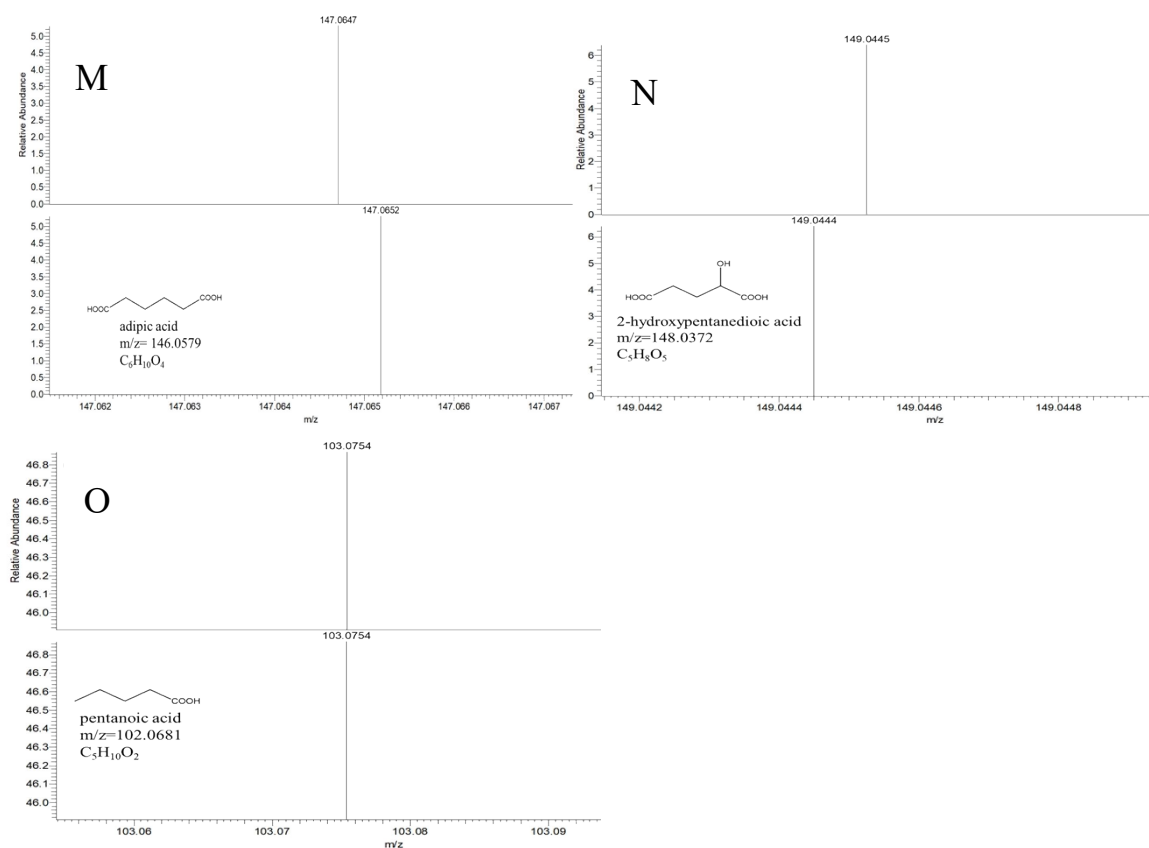

**Fig. S7.** HPLC-HRMS/MS mass spectra of the intermediates from the RhB degradation in the system of Fe/S<sub>0.05</sub>-BC activating PMS. The above graph is mass spectrum of RhB degradation solution, and the below graph is standard mass spectrum of the corresponding intermediate in library in each spectrum
